# Supplementary material
Source: PubMed Central journal article supplement (PMC9714519)
Supplement: NIHMS1525169-supplement-1525169_Sup_Info.pdf [file NIHMS1525169-supplement-1525169_Sup_Info.pdf]

## Supplementary Information

a) Place-manner tuples used to augment EMA trajectories (motivated by the radio\_ - phones phoneme feature descriptions in Festvox)

| Feature | Description           |
|---------|-----------------------|
| 1       | Voicing               |
| 2       | Unconstricted phoneme |
| 3       | Alveolar Fricative    |
| 4       | Alveolar Lateral      |
| 5       | Alveolar Nasal        |
| 6       | Alveolar Approximant  |
| 7       | Alveolar Stop         |
| 8       | Labiodental Fricative |
| 9       | Dental Fricative      |
| 10      | Glottal Fricative     |
| 11      | Labial Nasal          |
| 12      | Labial Approximant    |
| 13      | Labial Stop           |
| 14      | Palatal Affricate     |
| 15      | Palatal Fricative     |
| 16      | Palatal Approximant   |
| 17      | Velar Nasal           |
| 18      | Velar Stop            |

b) Sentences used in listening tests Original Source: MOCHA-TIMIT<sup>20</sup> dataset:

1. young people participate in athletic activities
2. although always alone we survive
3. at twilight on the twelfth day we'll have chablis
4. swing your arm as high as you can
5. don't do charlie's dirty dishes
6. catastrophic economic cutbacks neglect the poor
7. those thieves stole thirty jewels
8. aluminium cutlery can often be flimsy
9. those musicians harmonize marvellously
10. carl lives in a lively home
11. alimony harms a divorced man's wealth
12. nothing is as offensive as innocence
13. coconut cream pie makes a nice dessert
14. that pickpocket was caught red-handed
15. etiquette mandates compliance with existing regulations
16. she wore warm fleecy woolen overalls
17. he will allow a rare lie
18. before thursday's exam review every formula
19. beg that guard for one gallon of petrol
20. get a calico cat to keep the rodents away
21. she is thinner than i am
22. barb's gold bracelet was a graduation present
23. are your grades higher or lower than nancy's
24. mum strongly dislikes appetizers
25. stimulating discussions keep students' attention
26. critical equipment needs proper maintenance
27. the museum hires musicians every evening
28. only the most accomplished artists obtain popularity
29. where were you while we were away
30. tina turner is a pop singer
31. did dad do academic bidding
32. help greg to pick a peck of potatoes
33. grandmother outgrew her upbringing in petticoats
34. a good attitude is unbeatable
35. addition and subtraction are learned skills
36. when all else fails use force
37. why yell or worry over silly items
38. jane may earn more money by working hard
39. help celebrate your brother's success
40. alfalfa is healthy for you

41. most young rabbits rise early every morning
42. biblical scholars argue history
43. bright sunshine shimmers on the ocean
44. is this seesaw safe
45. this was easy for us
46. only lawyers love millionaires
47. elderly people are often excluded
48. will robin wear a yellow lily
49. basketball can be an entertaining sport
50. a roll of wire lay lay near the wall
51. the dark murky lagoon wound around for miles
52. take charge of choosing her bride's maids' gowns
53. the nearest synagogue may not be within walking distance
54. the hood of the jeep was steaming in the hot sun
55. drop five forms in the box before you go out
56. trish saw hours and hours of movies this saturday
57. cheap stockings run the first time they're worn
58. a leather handbag would be a suitable gift
59. the local drugstore was charged with illegally dispensing tranquilizers
60. the cranberry bog gets very pretty in autumn
61. i know i didn't meet her early enough
62. an adult male baboon's teeth are not suitable for eating shellfish
63. tofu is made from processed soybeans
64. al received a joint appointment in the biology and engineering departments
65. the groundhog clearly saw his shadow but stayed out only a moment
66. i'd rather not buy these shoes than be overcharged
67. the high security prison was surrounded by barbed wire
68. ducks have webbed feet and colorful feathers
69. those answers will be straightforward if you think them through carefully first
70. the bluejay flew over the high building
71. often you'll get back more than you put in
72. the two artists exchanged autographs
73. gregory and tom chose to watch cartoons in the afternoon
74. ship building is a most fascinating process
75. todd placed top priority on getting his bike fixed
76. the proof that you are seeking is not available in books
77. the big dog loved to chew on the old rag doll
78. a big goat idly ambled through the farmyard
79. please dig my potatoes up before the frost
80. did shawn catch that big goose without help
81. chip postponed alimony payments until the latest possible date
82. gus saw pine trees and redwoods on his walk through sequoia national forest
83. the fog prevented them from arriving on time

- 84.bob bandaged both wounds with the skill of a doctor
- 85.rock-and-roll music has a great rhythm
- 86.bob found more clams at the ocean's edge
- 87.cottage cheese with chives is delicious
- 88.the frightened child was gently subdued by his big brother
- 89.steve collects rare and novel coins
- 90.count the number of teaspoons of soysauce that you add
- 91.we like blue cheese but victor likes brie
- 92.that dog chases cats mercilessly
- 93.a chosen few will become generals
- 94.rob made hungarian goulash for dinner and gooseberry pie for desert
- 95.the full moon shone brightly that night
- 96.if people were more generous there would be no need for welfare
- 97.my desires are simple
- 98.give me one informative paragraph on the subject
- 99.the meeting is now adjourned
- 100.shaving cream is a popular item on halloween
- 101.amoebas change shape constantly

c) Class sizes for the listening tests

| Category         | Class size |
|------------------|------------|
| 1 syllable words | 75         |
| 2 syllable words | 158        |
| 3 syllable words | 68         |
| 4 syllable words | 24         |
| Sentences        | 101        |

d) Transcription interface for the intelligibility assessment (50 word interface)

Sentence Transcription Instructions (Click to expand)

Play Audio Vol+ Vol- Transcription :

Only choose from these words:

activities    desires    generals    maintenance    please  
 add    dessert    getting    man's    rock-and-roll  
 addition    dispensing    goose    moon    ship  
 athletic    divorced    grades    museum    steaming  
 bright    economic    high    neglect    students'  
 brother's    engineering    hours    now    sun  
 charlie's    existing    if    one    there  
 chases    flimsy    in    or    walk  
 colorful    full    innocence    participate    you'll  
 departments    gallon    lie    people    young

e) Number of listeners used for intelligibility assessments

| Intelligibility test description | Unique listeners |
|----------------------------------|------------------|
| Transcription_25word             | 48               |
| Transcription_50word             | 70               |
| 1syl_1in10                       | 187              |
| 1syl_1in25                       | 181              |
| 1syl_1in50                       | 163              |
| 2syl_1in10                       | 146              |
| 2syl_1in25                       | 144              |
| 2syl_1in50                       | 174              |
| 3syl_1in10                       | 101              |

|                 |     |
|-----------------|-----|
| 3syl_1in25      | 96  |
| 3syl_1in50      | 174 |
| 4syl_1in10      | 52  |
| 4syl_1in24      | 54  |
| sentences_1in10 | 56  |
| sentences_1in25 | 63  |
| sentences_1in50 | 46  |
